# Supplementary material for: Recombinant Human Plasma Gelsolin Stimulates Phagocytosis while Diminishing Excessive Inflammatory Responses in Mice with Pseudomonas aeruginosa Sepsis
Source: MDPI journal article supplement (doi:10.3390/ijms21072551), 2020-04-07

## **Recombinant human plasma gelsolin stimulates phagocytosis while diminishing excessive inflammatory responses in mice with *Pseudomonas aeruginosa* sepsis**

Ewelina Piktel, Urszula Wnorowska, Mateusz Cieśluk, Piotr Deptuła, Suhanya V. Prasad, Grzegorz Król, Bonita Durnaś, Andrzej Namiot, Karolina H. Markiewicz, Katarzyna Niemirowicz-Laskowska, Agnieszka Z. Wilczewska, Paul A. Janmey, Joanna Reszeć, Robert Bucki\*

### **Supplementary material.**

#### **List of figures.**

**Supplementary Figure 1.** Physicochemical properties of pGSN labeled by IRDye® 800CW (pGSN-800CW). FTIR spectra of unlabeled human plasma gelsolin (pGSN; grey line) and pGSN labeled by IRDye® 800CW (pGSN-800CW; green line) (panel A). Panels B-D show thermal properties of unlabeled pGSN (grey line) and pGSN labeled by IRDye® 800CW (pGSN-800CW; green line) evaluated using differential scanning calorimetry (panel B) and thermogravimetric analysis (panels C, D).

**Supplementary Figure 2.** Histological analysis of pancreas of Cby.Cg-Foxn1nu/cmdbmice. Hematoxylin-eosin staining was performed (50x and 200x). The presence of acute interstitial edematous (A), focal necrosis (B,C) and necrosis (D,E,F) in analyzed pancreas was noted.

# Supplementary Figure 1

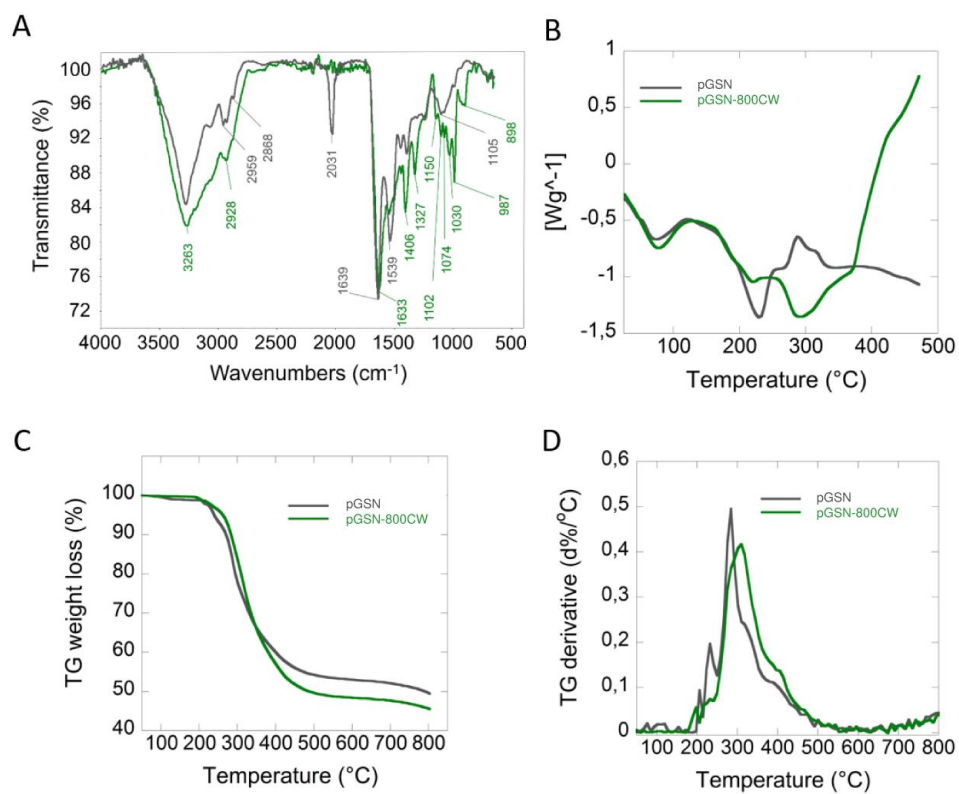

**Supplementary Figure 2**

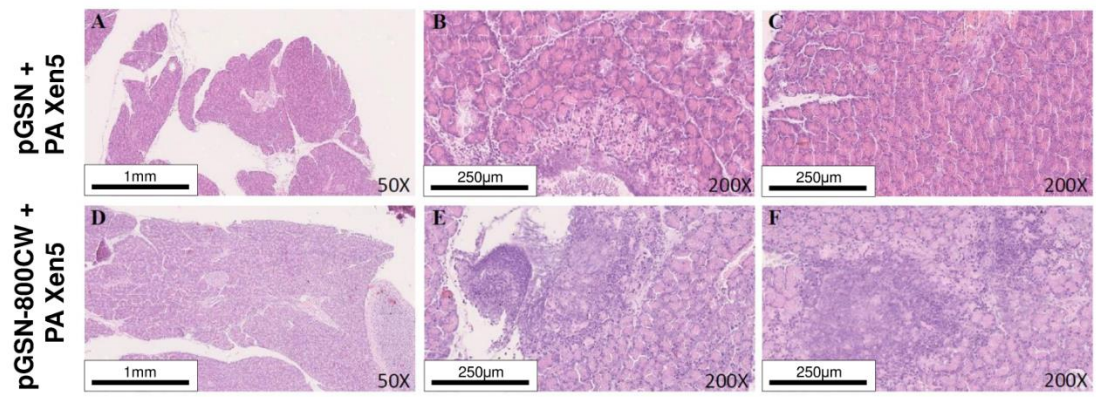

Supplement: s1 [file s1]
